1 Title

2 **Ecological selection for small microbial genomes along a temperate-to-thermal soil gradient**

3

4 Authors

5 Jackson W. Sorensen<sup>1</sup>, Taylor K. Dunivin<sup>1,2</sup>, Tammy C. Tobin<sup>3</sup>, and Ashley Shade<sup>1,4\*</sup>

6 1. Department of Microbiology and Molecular Genetics, Michigan State University, East  
7 Lansing MI 48840 USA

8 2. Environmental and Integrative Toxicological Sciences, Michigan State University, East  
9 Lansing MI 48840

10 3. Department of Biology, Susquehanna University, Selinsgrove, PA 17870 USA

11 4. Department of Plant, Soil and Microbial Sciences; Program in Ecology, Evolutionary  
12 Biology and Behavior; and the Plant Resilience Institute, Michigan State University, East  
13 Lansing, MI 48840

14

15 \*Materials and correspondence

16

17 Keywords

18 microbial ecology, genome size, genome reduction, thermophile, *Centralia*, coal seam fire,

19 metagenome, disturbance, extreme environment

## 20 Summary

21 Small bacterial and archaeal genomes provide insights into the minimal requirements for life<sup>1</sup>  
22 and seem to be widespread on the microbial phylogenetic tree<sup>2</sup>. We know that evolutionary  
23 processes, mainly selection and drift, can result in microbial genome reduction<sup>3,4</sup>. However, we  
24 do not know the precise environmental pressures that constrain genome size in free-living  
25 microorganisms. A study including isolates<sup>5</sup> has shown that bacteria with high optimum growth  
26 temperatures, including thermophiles, often have small genomes<sup>6</sup>. It is unclear how well this  
27 relationship may extend generally to microorganisms in nature<sup>7,8</sup>, and in particular to those  
28 microbes inhabiting complex and highly variable environments like soil<sup>3,6,9</sup>. To understand the  
29 genomic traits of thermally-adapted microorganisms, here we investigated bacterial and  
30 archaeal metagenomes from a 45°C gradient of temperate-to-thermal soils overlying the  
31 ongoing Centralia, Pennsylvania (USA) coal seam fire. There was a strong relationship between  
32 average genome size and temperature: hot soils had small genomes relative to ambient soils  
33 (Pearson's  $r = -0.910$ ,  $p < 0.001$ ). There was also an inverse relationship between soil  
34 temperature and cell size (Pearson's  $r = -0.65$ ,  $p = 0.021$ ), providing evidence that cell and  
35 genome size in the wild are together constrained by temperature. Notably, hot soils had  
36 different community structures than ambient soils, implicating ecological selection for thermo-  
37 tolerant cells that had small genomes, rather than contemporary genome streamlining within  
38 the local populations. Hot soils notably lacked genes for described two-component regulatory  
39 systems and antimicrobial production and resistance. Our work provides field evidence for the  
40 inverse relationship between microbial genome size and temperature requirements in a  
41 diverse, free-living community over a wide range of temperatures that support microbial life.

42 Our findings demonstrate that ecological selection for thermophiles and thermo-tolerant  
43 microorganisms can result in smaller average genome sizes *in situ*, possibly because they have  
44 small genomes reminiscent of a more ancestral state.

45  
46

47 Main text

48 Genome streamlining is a reduction in genome size to increase cellular efficiency, and it  
49 evolves by means of selection<sup>3</sup>. A comparative analysis of changes in microbial genomes sizes  
50 with optimal growth temperature found a negative relationship that was independent of  
51 phylogeny and environment<sup>6</sup>. This led to the conclusion that thermophiles are examples of  
52 free-living microorganisms subject to genome streamlining<sup>6,10,11</sup>. These results were exciting  
53 because they suggested that high temperature can select on genome size, providing insights  
54 into environmental conditions that may propel efficiency. For the comparative analysis<sup>6</sup> and  
55 cited studies therein, temperature optimum, genome size, 16S rRNA gene sequences, and  
56 habitat were available for a curated collection 115 bacterial and archaeal isolates<sup>5,12</sup>. Given  
57 biases of cultivation<sup>13</sup>, an outstanding question was whether the relationship between growth  
58 temperature and genome size would prove to be general for wild microbial communities.

59 Fortuitously, the fire-impact gradient at the Centralia ecosystem provides an  
60 opportunity to investigate relationships between temperature and microbial genome traits.  
61 Centralia, Pennsylvania is the site of a slow-burning, near-surface coal seam fire that ignited in  
62 1962. The heat from the fire vents through overlying soils, causing surface soil temperatures to  
63 reach as high as > 400°C<sup>14</sup>, but more recently in the range of 40 - 75°C<sup>15,16</sup>. However, the soils  
64 in Centralia were previously temperate, with no known exposure to prolonged high

65 temperatures. Therefore, Centralia offers an interesting model for the examining the eco-  
66 evolution of microbial communities <sup>17</sup>.

67 We recently used 16S rRNA gene amplicon sequencing to assess compositional changes  
68 in Centralia soil microbial communities along an ambient-to-thermal temperature gradient <sup>16</sup>.  
69 Surface soils overlying the coal seam fire were collected to include soils that were hot from fire  
70 (“fire-affected”), soils that were previously hot but had since recovered to ambient  
71 temperatures (“recovered”) and reference soils that had never been impacted by the fire. As  
72 expected, fire-affected soils had starkly different community structure from ambient soils.  
73 However, after the fire advanced, soils reasonably recovered towards reference community  
74 structure. This suggested a considerable capacity of soil microbiomes for resilience, even after  
75 exposure to a severe and unanticipated stressor, and prompted us to next ask what microbial  
76 attributes underlay the observed changes in community structure in fire-affected soils.

77 Moving forward, we assessed average genome size along the Centralia fire gradient  
78 (**Table S1**). From twelve metagenomes (six fire-affected, five recovered, and one reference),  
79 we used MicrobeCensus <sup>18</sup> to calculate average genome size across a soil temperature range of  
80 45 °C. Average genome sizes were negatively and strongly correlated with temperature (**Figure**  
81 **1A**, Pearson’s  $r = -0.910$ ,  $p < 0.001$ ). In addition to MicrobeCensus, we used three other distinct  
82 and complementary methods to assess changes in genome size with soil temperature and  
83 found them all to be in agreement (**Figure S1**). To the best of our knowledge, this is the first  
84 report of decreases in genome size across an *in situ* temperature gradient that supports the  
85 broad range of physiological requirements from mesophiles to thermophiles.

86 We next compared the average genome sizes estimated from *Centralia* metagenomes  
87 to those from 22 publicly available soil metagenomes (**Figure 2, Table S2**). Generally, hot soils  
88 in *Centralia* had small genomes relative to other soils, while ambient soils in *Centralia* were  
89 closer to the average size observed among this set. Intriguingly, permafrost soils also harbored  
90 small average genomes and were comparable to the hottest *Centralia* sites. These results  
91 support comparably small genome sizes in *Centralia* soils and also provide a range of expected  
92 soil genome sizes more generally.

93 It was hypothesized that small cells may be selected to attain minimal cellular  
94 maintenance costs at high temperatures, and that small cells indirectly select for small  
95 genomes <sup>6</sup>. Because we had microscope images from soil cell counts in *Centralia*<sup>16</sup>, we re-  
96 analyzed the images to extract size information. We found that average cell sizes were also  
97 negatively correlated with temperature (**Figure 1B**, Pearson's  $r = -0.65$ ,  $p = 0.021$ ). Accordingly,  
98 cell size had a direct relationship with genome size (**Figure 1C**, Pearson's  $r = 0.64$ ,  $p = 0.025$ ).  
99 These results agree with reported *in situ* relationships between cell size and temperature in  
100 aquatic systems. For example, an experiment investigating a 6°C increase in water temperature  
101 confirmed that smaller cells with lower nucleotide content were selected at warmer  
102 temperatures <sup>7</sup>, providing support that even slight warming may enrich for microorganisms  
103 with small genomes. An observational study of marine microbial genome size along a  
104 latitudinal gradient (10.7°C range) also supports this hypothesis <sup>8</sup>. Our results extend the cell  
105 size-temperature trend to soils and also to a temperature range encompassing 45 °C.

106 To understand the selective outcomes of high temperature on the functions of these  
107 small genomes, we next asked if there were functional genes that were characteristically

108 enriched or depleted with increasing temperature. We used shotgun metagenome annotations  
109 from the KEGG module (KM) database<sup>19</sup>. KMs are groups of KEGG Orthologs (KOs) that  
110 represent complexes, functional sets, metabolic pathways, or signatures. Eighty-one percent of  
111 KOs detected in *Centralia* metagenomes were detected in all soils, and many patterns with  
112 temperature were attributable to changes in normalized KO abundance rather than in KO  
113 detection. In total, 284 (out of 541 detected; 52.50%) were correlated with temperature (**Figure**  
114 **3, Table S3**).

115         Twenty-seven KMs were positively correlated with temperature (Pearson's  $R > 0.656$ ,  
116 false discovery rate adjusted p-value  $< 0.05$ ; **Figure 3A**). Specifically, dissimilatory sulfate  
117 reduction (M00596), dissimilatory nitrate reduction (M00530) and denitrification (M00529)  
118 were enriched in hot soils (**Figure 3A, cluster iii; Figure 4A**). These are anaerobic processes  
119 aligned with known and expected environmental conditions in *Centralia*. Fire-affected soils  
120 from active vents have higher moisture than reference and recovered soils (Pearson's  $r = 0.714$ ,  
121  $p < 0.01$ ), which likely promote inundated and anaerobic microhabitats therein. Prior work in  
122 *Centralia* has indicated an importance of these metabolisms in hot soils, noting that sulfur,  
123 sulfate, nitrate and ammonium were commonly elevated at vents<sup>14,15</sup>. These results also agree  
124 with observations of thermophile metabolisms in other terrestrial and geothermal  
125 environments, including a prevalence of denitrification and dissimilatory nitrate reduction<sup>20,21</sup>,  
126 highly active nitrogen cycles in hot springs<sup>22</sup>, and increased dissimilatory organic sulfur  
127 mineralization<sup>23</sup>. Notably, these anaerobic KMs grouped in their response patterns with several  
128 archaeal proteins (**Figure 3A cluster iii**; Archaeal ribosome M00179, polymerase M00184, and  
129 exosome M00390). We also observed an increase in Crenarchaeota in fire-affected soils<sup>16</sup>, an

130 archaeal phylum that includes sulfate reducers<sup>24</sup>. Additional results describing patterns and  
131 thresholds of KM enrichment with temperature are provided in Supporting Materials. Together,  
132 these data suggest that the pathways enriched in small genomes from hot soils offer functions  
133 attuned to the *Centralia* habitat.

134 Temperature was negatively correlated with 257 KMs (47.5% out of 541 total KMs  
135 detected, Pearson's  $R < -0.6$ , false discovery rate adjusted p-value  $< 0.05$ ; **Figure 3B**). In general,  
136 these depleted KMs were detected across recovered soils and the reference soil. There were  
137 two noteworthy categories of KMs that were consistently depleted in hot soils: antimicrobial  
138 resistance and production and two component regulatory systems (**Figure 4B**). Together, these  
139 two KM categories comprised 32.7% of KMs negatively correlated with temperature (84 out of  
140 257). This trend was striking, but we also note that some KMs belonging to these categories had  
141 no relationships with temperature and that these KM categories were always detected in fire-  
142 affected soils.

143 Thirty-nine modules for antimicrobial production and resistance mechanisms were  
144 negatively correlated with temperature (**Figure 4B**), which agrees with a prior analysis of  
145 antibiotic resistance genes in this system<sup>25</sup>. Among these modules were resistance to  
146 vancomycin, tetracycline, fluoroquinolone, aminoglycoside, nisin, erythromycin, streptomycin  
147 and beta-lactam, and several multidrug efflux pumps. The small genomes of host-associated  
148 symbionts often lack antimicrobial genes<sup>26</sup>. However, the *Pelagibacter* clade, which is a model  
149 free-living population that has streamlined genomes, has a conserved multidrug transporter  
150 across sequenced genomes<sup>27</sup>. It could be that thermophiles have fewer genes encoding  
151 resistance to described antimicrobials, as evidenced by the challenges inherent in developing

152 specific selectable antibiotic resistance markers for thermophiles<sup>28,29</sup>. A related consideration  
153 is that, like most databases, KEGG is biased towards genomes and annotations from fast-  
154 growing mesophiles and may have missed annotation of under-described thermophile  
155 antimicrobials. To clarify whether the observed decrease in antimicrobial production and  
156 resistance was due to unannotated novelty or a true deficit of these functions in thermal sites,  
157 annotation-independent methods could be used to identify antimicrobial-related biosynthetic  
158 gene clusters from Centralia metagenomes<sup>30,31</sup>. In addition, functional screens of Centralia  
159 isolates could be performed for antibiotic production and resistances. If there is a true deficit in  
160 genes encoding antimicrobial production and resistance, it could be that the thermal conditions  
161 present a strong environmental filter that reduces competition among the populations tolerant  
162 of the heightened temperature. Our previous work reported decreased richness and  
163 phylogenetic diversity fire-affected Centralia soils<sup>16</sup>, suggesting that there is a smaller pool of  
164 potential competitors inhabiting the hot soils.

165         Additionally, forty-nine detected two-component regulatory system modules were also  
166 negatively correlated with temperature (Pearson's  $R < -0.6$ , **Figure 4B**). Two-component  
167 systems consist of a sensor kinase and a response regulator and allow for transcriptional  
168 responses to environmental stimuli<sup>32</sup>. This simple regulatory system allows bacteria to respond  
169 to multiple stimuli: the involved genes duplicate, the sensors evolve sensitivity to additional  
170 stimuli, and additional genes are transcribed<sup>32,33</sup>. Previous studies suggested that smaller  
171 genomes have fewer regulatory components<sup>34</sup>, and this relationship is often observed in  
172 streamlined genomes<sup>3,8</sup>. Our results agree with observations of generally less regulation with  
173 smaller genomes<sup>4,11,27,35,36</sup> and also suggest that thermophiles may have lower regulatory



174 needs. It has been proposed that thermophiles with “streamlined” genomes may be more  
175 likely to utilize global regulatory systems that mediate transcriptional responses to co-occurring  
176 environmental stimuli <sup>11</sup>. The degree of environmental variability is also predicted to influence  
177 the relative benefit an organism gains from investing in sensing its environment <sup>37</sup>. As a  
178 common case study in genome reduction, obligate endosymbionts are thought to have drifted  
179 towards small genomes in part because environmental conditions are stable and thus sensing  
180 requirements are minimal (e.g., <sup>3</sup>). Furthermore, in *Centralia*, seasonal temperature  
181 fluctuations in fire-affected soils are equivalent to those in ambient soils (**Figure S2**), providing  
182 evidence that the soils experience similar environmental stability in temperature, albeit at  
183 different ranges. This suggests that small genomes are not necessarily conditional on very  
184 stable environments <sup>3</sup>. Future work should investigate whether two-component regulatory  
185 systems are consistently less prevalent among thermophiles, and, if so, whether their absence  
186 is reminiscent of an ancestral state.

187         Our field study supports and reinforces cultivation-dependent observations that  
188 suggested bacteria and archaea with small genome sizes have higher growth temperatures <sup>6</sup>.  
189 Because our study considers ecological succession, as evidenced by the turnover in community  
190 membership between ambient and hot soils<sup>16</sup>, these data indicate that environmental  
191 microorganisms with relatively higher temperature requirements also are likely to have small  
192 genomes and cell sizes. Surprisingly, it also suggests that microbial populations inhabiting  
193 complex environments, like soils, may generally reflect similar overarching traits in genome size  
194 as those observed in laboratory studies, which are necessarily biased towards fast-growing  
195 organisms that often are of medical, industrial, or agricultural interest (e.g., <sup>38</sup>). In addition, this

196 work expands upon previous reports of smaller genomes with higher temperatures<sup>7,8</sup> to  
197 consider a range of *in situ* temperatures at which a variety of microbes compete in non-optimal  
198 conditions. For example, we would expect mesophiles growing near their upper temperature  
199 ranges and thermophiles growing near their lower temperature ranges to co-occur at some  
200 sites in Centralia. Therefore, these results are relevant to the experiences of many wild  
201 microorganisms that cope with dynamic environments.

202 Our results add evidence that supports both smaller genomes and cells, on average,  
203 with higher temperatures but also offer a key point of distinction. Though the taxa enriched in  
204 Centralia hot soils characteristically had smaller genomes and cells, there is no evidence for  
205 contemporary genome streamlining in Centralia. Rather, we suspect that these thermo-tolerant  
206 cells were resuscitated from the vast dormant pool in soil. This is supported by three lines of  
207 evidence. First, there was turnover in community membership across hot and ambient  
208 Centralia soils<sup>16</sup>, providing evidence against contemporary streamlining within local lineages.  
209 Second, there was striking comparability in average genome size of hot Centralia soils to  
210 ancient permafrost soils, which largely contain an inactive and very old dormant pool. Third,  
211 many other studies have described thermophile persistence and resuscitation from non-  
212 thermal environments, suggesting that these lineages are widespread but typically inactive<sup>21,39–</sup>  
213<sup>43</sup>. Therefore, we posit that Centralia small genomes are characteristic of an ancestral trait of  
214 previously dormant thermophiles in the soil and not the outcome of genome streamlining.

215 In conclusion, we found a strong negative relationship between average microbial  
216 genome size and temperature in Centralia soils along a mesophile-to-thermophile gradient,  
217 spanning 45°C. We also found that cells were smaller in hot soils, supporting the hypothesis

218 that thermo-tolerant bacteria have smaller cell size, which indirectly selects for small genomes  
219 <sup>6</sup>. By KEGG annotations, *Centralia* metagenomes at hot temperatures were best defined by  
220 what they lacked rather than enriched modules of distinctive metabolisms. Specifically,  
221 environmental sensing mechanisms, such as two-component regulatory systems, and  
222 antimicrobial production and resistance mechanisms were in lower abundance in hot soils. In  
223 addition, there were a few modules enriched at high temperatures that met expectations for  
224 the hot anaerobic environment at active vents, including nitrogen and sulfur metabolism. Our  
225 results show that the relationship that was observed between growth temperature and  
226 genome size for cultivable isolates also holds true in a complex, *in situ* microbial community  
227 that inhabits a complex and variable soil environment. We suggest that, for thermo-tolerant  
228 organisms, the relationship between temperature and genome size indicates the precursory  
229 microbial condition of small genomes, reminiscent of ancient lineages, rather than  
230 contemporary genome streamlining.

231

## 232 Materials and Methods

### 233 *DNA extraction and metagenome sequencing*

234 DNA for metagenome sequencing was manually extracted using a phenol chloroform extraction  
235 <sup>44</sup> and then purified using the MoBio DNEasy PowerSoil Kit (MoBio, Solana Beach, CA, USA)  
236 according the manufacturer's instructions. Total DNA sequencing was performed on all 12  
237 samples by the Department of Energy's Joint Genome Institute (Community Science Project)  
238 using an Illumina HiSeq 2500. Libraries were prepared with a targeted insert size of 270 base

239 pairs. Samples had between 19Gbp and 50Gbp of sequence data. Additional methodology  
240 details are provided in Supporting Materials.

241

#### 242 *Quality control, assembly and annotation*

243 Assembly was performed by the Joint Genome Institute according to their standard operating  
244 procedure (Supporting Materials). To use all sequencing data, we worked with assembled and  
245 unassembled reads processed by Integrated Microbial Genomes (IMG) using their standard  
246 annotation pipeline<sup>45</sup>. After comparing several annotation methods (Supporting Materials), we  
247 chose to use the KEGG Orthology database for analyzing the *Centralia* data due to its inherent  
248 structure and ability to integrate metabolic pathways. KEGG Ortholog (KO) abundances were  
249 relativized to the median abundance in each site of a set of 36 single copy genes published  
250 previously<sup>46</sup> (see Supporting Materials). One single copy gene (K01519) was an outlier in 7 out  
251 of 12 samples as assessed by Grubb's test for outliers and removed. We analyzed patterns in  
252 KEGG Modules (KMs)<sup>19</sup>, a set of manually defined functional units made up of multiple KOs. KM  
253 abundances were calculated based on the median abundance of their constituent KOs that  
254 were present in the metagenomes. KMs were included in analysis if 50% or more of their  
255 constituent KOs were identified in the dataset. Approximately one third of the open reading  
256 frames per sample were able to be annotated with KEGG (**Table S1**). As a caveat to the study,  
257 unannotated open reading frames can result from erroneous reads and mis-assemblies but also  
258 could be novel and or divergent genes critical for microbial processes. Thus, new annotations  
259 could impact the overarching patterns described here.

260

261 *Average genome and cell size*

262 Average genome size was calculated from the quality filtered DNA sequences using  
263 MicrobeCensus (“run\_microbe\_census.y -n 2000000”), which estimates average genome size  
264 by calculating the percent of sampled reads that match to a set of single copy genes<sup>18</sup>. We also  
265 used three additional methods to calculate average genome size (see Supporting Materials),  
266 and all were in agreement in revealing the negative relationship between temperature and  
267 average genome size. To calculate cell size, we re-analyzed microscope images previously used  
268 to count microbial cells for community size quantifications in the same soils<sup>16</sup>. We hand-  
269 curated a debris-free subset from the images and measured 44 - 910 cells from 3 - 9 replicate  
270 fields for each soil. The major and minor axes of cells were measured using a FIJI macro in  
271 ImageJ (Version: 2.0.0-rc-65/1.51s Build: 961c5f1b7f). We found that cell size range and  
272 deviations (**Table S4**) were consistent with those previously reported<sup>48</sup>.

273

274 *Comparisons with other soil metagenomes*

275 All metagenomic data sets for comparison were obtained from MG-RAST  
276 (<http://metagenomics.anl.gov/>). The MG-RAST database was searched with the following  
277 criteria: material = soil, sequence type = shotgun, public = true. The resulting list of  
278 metagenome data sets were ordered by number of base pairs (bp). Metagenomic data sets  
279 with the most bp were included if they were sequenced using Illumina (to standardize  
280 sequencing errors), had an available FASTQ file (for internal quality control), and contained <  
281 30% low quality as determined by MG-RAST. Within high quality Illumina samples, priority for  
282 inclusion was given to projects with multiple samples. When a project had multiple samples,

283 data sets with the greatest bp were selected. This search yielded 22 data sets from 12 locations  
284 and five countries (**Table S2**). Sequences from MG-RAST data sets were quality checked using  
285 FastQC (v0.11.3,<sup>49</sup> and quality controlled using the FASTX toolkit (fastq\_quality\_filter, "-Q33 -q  
286 30 -p 50"). Average genome size for each dataset was calculated from the quality filtered DNA  
287 sequences using MicrobeCensus with default parameters.

288

### 289 *Statistical analyses*

290 Statistics for the metagenome datasets were performed in the R environment for  
291 statistical computing<sup>50</sup>. The stats package was used for calculating Pearson's correlations<sup>50</sup>. The  
292 outliers package<sup>51</sup> was used for identifying outlying KOs. The ggplot2 package was used for  
293 visualization<sup>52</sup>. Heat maps were created with heatmap2 from the gplots package<sup>53</sup>.

294

### 295 *Data and workflows*

296 All analysis workflows are available on GitHub (ShadeLab/PAPER\_SorensenInPrep).

297 Metagenome data are available on IMG under the GOLD Study ID GS0114513.

298

### 299 *References*

- 300 1. Hutchison, C. A. *et al.* Design and synthesis of a minimal bacterial genome. *Science* (80- ).  
301 **351**, (2016).
- 302 2. Hug, L. A. *et al.* A new view of the tree of life. *Nat. Microbiol.* **1**, 16048 (2016).
- 303 3. Giovannoni, S. J., Thrash, J. C. & Temperton, B. Implications of streamlining theory for  
304 microbial ecology. *ISME J.* **8**, 1553–1565 (2014).
- 305 4. McCutcheon, J. P. & Moran, N. A. Extreme genome reduction in symbiotic bacteria.  
306 *Nature Reviews Microbiology* **10**, 13–26 (2012).
- 307 5. Vieira-Silva, S. & Rocha, E. P. C. The systemic imprint of growth and its uses in ecological  
308 (meta)genomics. *PLoS Genet.* **6**, (2010).
- 309 6. Sabath, N., Ferrada, E., Barve, A. & Wagner, A. Growth temperature and genome size in

- 310 bacteria are negatively correlated, suggesting genomic streamlining during thermal  
311 adaptation. *Genome Biol. Evol.* **5**, 966–977 (2013).
- 312 7. Huete-Stauffer, T. M., Arandia-Gorostidi, N., Alonso-Sáez, L. & Morán, X. A. G.  
313 Experimental warming decreases the average size and nucleic acid content of marine  
314 bacterial communities. *Front. Microbiol.* **7**, (2016).
- 315 8. Swan, B. K. *et al.* Prevalent genome streamlining and latitudinal divergence of planktonic  
316 bacteria in the surface ocean. *Proc. Natl. Acad. Sci.* **110**, 11463–11468 (2013).
- 317 9. Brewer, T. E., Handley, K. M., Carini, P., Gilbert, J. A. & Fierer, N. Genome reduction in an  
318 abundant and ubiquitous soil bacterium ‘Candidatus Udaeobacter copiosus’. *Nat.*  
319 *Microbiol.* **2**, (2016).
- 320 10. Saha, D., Panda, A., Podder, S. & Ghosh, T. C. Overlapping genes: a new strategy of  
321 thermophilic stress tolerance in prokaryotes. *Extremophiles* **19**, 345–353 (2015).
- 322 11. Wang, Q., Cen, Z. & Zhao, J. The Survival Mechanisms of Thermophiles at High  
323 Temperatures: An Angle of Omics. *Physiology* **30**, 97–106 (2015).
- 324 12. Rocha, E. P. C. Codon usage bias from tRNA’s point of view: Redundancy, specialization,  
325 and efficient decoding for translation optimization. *Genome Res.* **14**, 2279–2286 (2004).
- 326 13. Rappé, M. S., Giovannoni, S. J., Rappe, M. S. & Giovannoni, S. J. The uncultured microbial  
327 majority. *Annu. Rev. Microbiol.* **57**, 369–394 (2003).
- 328 14. Janzen, C. & Tobin-Janzen, T. Microbial communities in fire-affected soils. in *Microbiology*  
329 *of Extreme Soils* 299–316 (Springer, 2008).
- 330 15. Tobin-Janzen, T. *et al.* Nitrogen changes and domain bacteria ribotype diversity in soils  
331 overlying the Centralia, Pennsylvania underground coal mine fire. *Soil Sci.* **170**, (2005).
- 332 16. Lee, S.-H., Sorensen, J. W., Grady, K. L., Tobin, T. C. & Shade, A. Divergent extremes but  
333 convergent recovery of bacterial and archaeal soil communities to an ongoing  
334 subterranean coal mine fire. *ISME J.* **11**, 1447–1459 (2017).
- 335 17. Shade, A. Understanding microbiome stability in a changing world. *mSystems* **3**, e00157-  
336 17 (2018).
- 337 18. Nayfach, S. & Pollard, K. S. Average genome size estimation improves comparative  
338 metagenomics and sheds light on the functional ecology of the human microbiome.  
339 *Genome Biol.* **16**, 51 (2015).
- 340 19. Kanehisa, M., Furumichi, M., Tanabe, M., Sato, Y. & Morishima, K. KEGG: New  
341 perspectives on genomes, pathways, diseases and drugs. *Nucleic Acids Res.* **45**, D353–  
342 D361 (2017).
- 343 20. Torre, R. De, Dodsworth, J. A. & Hungate, B. Measuring Nitrification , Denitrification , and  
344 Related Biomarkers in Terrestrial Geothermal Ecosystems. **486**, (2011).
- 345 21. Marchant, R. *et al.* Thermophilic bacteria in cool temperate soils: Are they metabolically  
346 active or continually added by global atmospheric transport? *Appl. Microbiol. Biotechnol.*  
347 **78**, 841–852 (2008).
- 348 22. Reigstad, L. J. *et al.* Nitrification in terrestrial hot springs of Iceland and Kamchatka. *FEMS*  
349 *Microbiol. Ecol.* **64**, 167–174 (2008).
- 350 23. Santana, M., Gonzalez, J. & Clara, M. Inferring pathways leading to organic-sulfur  
351 mineralization in the Bacillales. *Crit. Rev. Microbiol.* **42**, 31–45 (2016).
- 352 24. Itoh, T., Suzuki, K., Sanchez, P. C. & Nakase, T. *Caldivirga maquilingensis* gen. nov., sp.  
353 nov., a new genus of rod-shaped crenarchaeote isolated from a hot spring in the

- 354 Philippines. *Int J Syst Bacteriol* **49**, 1157–1163 (1999).
- 355 25. Dunivin, T. K. & Shade, A. Community structure explains antibiotic resistance gene  
356 dynamics over a temperature gradient in soil. *FEMS Microbiol. Ecol.* **fiy016**, (2018).
- 357 26. Gao, Z. M. *et al.* Symbiotic Adaptation Drives Genome Streamlining of the Cyanobacterial  
358 Sponge Symbiont ‘Candidatus *Synechococcus spongiarum*’. *MBio* **5**, 1–11 (2014).
- 359 27. Grote, J. *et al.* Streamlining and Core Genome Conservation among Highly Divergent  
360 Members of the SAR11 Clade. *MBio* **3**, 1–13 (2012).
- 361 28. Brouns, S. J. J. *et al.* Engineering a Selectable Marker for Hyperthermophiles. *J. Biol.*  
362 *Chem.* **280**, 11422–11431 (2005).
- 363 29. Hoseki, J., Yano, T., Koyama, Y. & Kuramitsu, S. Directed Evolution of Thermostable  
364 Kanamycin-Resistance Gene : A Convenient Selection Marker for *Thermus thermophilus*  
365 **1**. **956**, 951–956 (1999).
- 366 30. Weber, T. *et al.* antiSMASH 3 . 0 — a comprehensive resource for the genome mining of  
367 biosynthetic gene clusters. **43**, 237–243 (2017).
- 368 31. Hadjithomas, M. *et al.* IMG-ABC : A Knowledge Base To Fuel Discovery of Biosynthetic  
369 Gene Clusters and Novel Secondary Metabolites. *MBio* **6**, 1–10 (2015).
- 370 32. Hoch, J. A. Two-component and phosphorelay signal transduction. 165–170 (2000).
- 371 33. Whitworth, D. E. & Cock, Æ. P. J. A. Evolution of prokaryotic two-component systems :  
372 insights from comparative genomics. 459–466 (2009). doi:10.1007/s00726-009-0259-2
- 373 34. Ranea, J. A. G., Grant, A., Thornton, J. M. & Orengo, C. A. Microeconomic principles  
374 explain an optimal genome size in bacteria. **21**, 21–25 (2005).
- 375 35. Moran, N. A. Microbial minimalism: Genome reduction in bacterial pathogens. *Cell* **108**,  
376 583–586 (2002).
- 377 36. Yus, E. *et al.* Impact of Genome Reduction on Bacterial Metabolism and Its Regulation.  
378 *Science (80-. )*. **326**, 1263–1268 (2009).
- 379 37. Kussell, E. & Leibler, S. Phenotypic diversity, population growth, and information in  
380 fluctuating environments. *Science* **309**, 2075–2078 (2005).
- 381 38. Gweon, H. S., Bailey, M. J. & Read, D. S. Assessment of the bimodality in the distribution  
382 of bacterial genome sizes. *ISME J.* **11**, 821–824 (2017).
- 383 39. Rahman, T. J., Marchant, R. & Banat, I. M. Distribution and molecular investigation of  
384 highly thermophilic bacteria associated with cool soil environments. *Biochem. Soc. Trans.*  
385 **32**, 209–213 (2004).
- 386 40. Portillo, M. C., Santana, M. & Gonzalez, J. M. Presence and potential role of thermophilic  
387 bacteria in temperate terrestrial environments. *Naturwissenschaften* **99**, 43–53 (2012).
- 388 41. Perfumo, A. & Marchant, R. Global transport of thermophilic bacteria in atmospheric  
389 dust. *Environ. Microbiol. Rep.* **2**, 333–339 (2010).
- 390 42. Hubert, C. *et al.* A Constant Flux of Diverse Thermophilic Bacteria into the Cold Arctic  
391 Seabed. *Science (80-. )*. **325**, 1541–1544 (2009).
- 392 43. Müller, A. L. *et al.* Endospores of thermophilic bacteria as tracers of microbial dispersal  
393 by ocean currents. *ISME J.* **8**, 1153–65 (2014).
- 394 44. Cho, J.-C., Lee, D.-H., Cho, Y.-C., Cho, J.-C. & Kim, S.-J. Direct Extraction of DNA from Soil  
395 for Amplification of 16S rRNA Gene Sequences by Polymerase Chain Reaction. *J.*  
396 *Microbiology* 229–235 (2006).
- 397 45. Huntemann, M. *et al.* The standard operating procedure of the DOE-JGI Metagenome



- 398 Annotation Pipeline (MAP v.4). *Stand. Genomic Sci.* **11**, (2016).  
399 46. He, S. *et al.* Patterns in wetland microbial community composition and functional gene  
400 repertoire associated with methane emissions. *MBio* **6**, e00066-15 (2015).  
401 47. Grubbs, F. E. Sample criteria for testing outlying observations. *Ann. Math. Stat.* 27–58  
402 (1950).  
403 48. Balkwill, D. L. & Casida, L. E. Microflora of soil as viewed by freeze etching. *J. Bacteriol.*  
404 **114**, 1319–1327 (1973).  
405 49. Andrews, S. FastQC: a quality control tool for high throughput sequence data. (2010).  
406 50. R Core Team. R: A Language and Environment for Statistical Computing. (2017).  
407 51. Komsta, L. outliers: Tests for outliers. *R Packag. version 0.14* . [http://CRAN.R-](http://CRAN.R-project.org/package=outliers)  
408 [project.org/package=outliers](http://CRAN.R-project.org/package=outliers) (2011). doi:doi:10.1201/9780203910894.ch6  
409 52. Wickham, H. *ggplot2: Elegant graphics for data analysis*. (Springer-Verlag, 2009).  
410 53. Warnes, G. R. *et al.* gplots: Various R Programming Tools for Plotting Data. (2016).  
411  
412

#### 413 Acknowledgements

414 This research was supported by Michigan State University. Computational resources were  
415 provided by the Institute for Cyber-Enabled Research. Metagenome sequencing was supported  
416 by the Joint Genome Institute Community Science Project #1834. The work conducted by the  
417 U.S. Department of Energy Joint Genome Institute, a DOE Office of Science User Facility, is  
418 supported under Contract No. DE-AC02-05CH11231. We thank Keara L. Grady and Sang-Hoon  
419 Lee for technical support and Susanna Yeh (REU-ACRES NSF Grant # 1560168) for assistance  
420 with soil metagenome curation from MG-RAST and analyses.

421

#### 422 Contributions

423 AS and TCT conceived the study and conducted field work. JWS and TKD performed analyses,  
424 with direction and oversight by AS. JWS, AS and TKD contributed writing. All authors discussed  
425 results, and commented on and edited the manuscript.

426

427 Competing financial interests

428 The authors declare no competing financial interests.

429

430 Figure Legends

431 Figure 1. Changes in average genome and cell sizes across the soil temperature gradient in  
432 Centralia. (A) Average genome size in each metagenome was calculated using MicrobeCensus  
433 and plotted against site temperature. (B) Average cell length was measured from 44-910 cells  
434 from 3-9 replicate fields for each soil and plotted against soil temperature. (C) Average genome  
435 size had a direct relationship with average cell size.

436

437 Figure 2. Average genome size in soil metagenomes, estimated using MicrobeCensus.<sup>18</sup>

438 Samples are ordered by average genome size and colored by sample location.

439

440 Figure 3. Heatmap of KEGG modules correlated with temperature (false discovery rate adjusted  
441 p-value < 0.05). Modules (rows) are centered and standardized across Centralia metagenomes  
442 (columns), with warm colors showing relative enrichment and cool colors showing relative  
443 depletion. Modules with significant relationships with temperature are shown. Sites are  
444 arranged by increasing temperature from left to right. (A) 27 KEGG modules were positively  
445 correlated with temperature (Pearson's R range = 0.646 to 0.933). (B) 257 KEGG modules were  
446 negatively correlated with temperature (Pearson's R range = -0.642 to -0.925). A third of the  
447 KEGG modules negatively correlated with temperature were either two-component regulatory

448 systems (TCRS, blue dendrogram tips), antimicrobial resistance or production (ARP, gray tips),  
449 or both (black tips). Note differences in color gradient ranges across panels A and B.

450

451 Figure 4. KEGG modules that had notable enrichments or depletions with temperature. (A) The  
452 median abundances of KEGG modules for denitrification (red), dissimilatory nitrate reduction  
453 (green) and dissimilatory sulfate reduction (blue) were all positively correlated with  
454 temperature. (B) Pearson's correlation values for all detected modules classified as antibiotic  
455 resistance and production (gray density,  $n = 62$  detected modules) or two-component  
456 regulatory systems (blue density,  $n = 89$  detected modules). The black vertical line  
457 distinguishes correlation values that are significant at a false discovery rate adjusted  $p$ -value  $<$   
458  $0.05$  (left), and all of these had a strong and negatively relationship with temperature. In total,  
459 there were 39 antimicrobial resistance and production modules and 49 two-component  
460 regulatory system modules that significantly decreased with temperature.

461

462 Supporting Figures

463 Figure S1. Complementary methods used to assess changes in average genome size across the  
464 soil temperature gradient in Centralia. (A) Odds ratios were calculated for 35 single-copy gene  
465 KEGG Orthologs in each site and plotted against site temperature. Reported correlation is  
466 between all single copy gene odds ratios and temperature, and all  $p < 0.001$ . (B) Average  
467 genome size in each site was calculated based on phylum level abundances from 16S rRNA gene  
468 amplicon data, using weighted average genome sizes of each phylum present in JGI IMG

469 (accessed 19 June 2017, correlation  $p < 0.001$ ). (C) Average MAG size at each site was calculated  
470 based on presence/absence of 104 MAGs (correlation  $p = 0.029$ ).

471

472 Figure S2. Annual temperature fluctuations at three fire-affected (circles) and two ambient  
473 (triangles) Centralia sites, measured using *in situ* temperature loggers (HOBOS) that were buried  
474 5 - 10 cm below the surface. Temperature loggers were deployed after the soils were collected  
475 for this study.

476

477 Supporting Tables

478 Table S1. Sequence summary information for *Centrاليا* metagenomes. Soils were collected 03-  
479 07 October 2014. Asterisks indicate that the site was actively venting at the time of soil  
480 collection.

481 Table S2. MG-RAST metadata for soil metagenomes used in this study.

482 Table S3. KEGG Modules significantly correlated with temperature (false-discovery-rate  
483 adjusted p-value <0.05)

484 Table S4. Cell size measurements from microscope images.

485 Table S5. Single-copy KEGG Orthologs' odds ratios correlations with temperature.

486 Table S6. Lineage, completeness and contamination of Metagenome Assembled Genomes as  
487 estimated by CheckM

488

489  
490  
491  
492  
493  
494  
495

Figure 1. Changes in average genome and cell sizes across the soil temperature gradient in Centralia. (A) Average genome size in each metagenome was calculated using MicrobeCensus and plotted against site temperature. (B) Average cell length was measured from 44-910 cells from 3-9 replicate fields for each soil and plotted against soil temperature. (C) Average genome size had a direct relationship with average cell size.

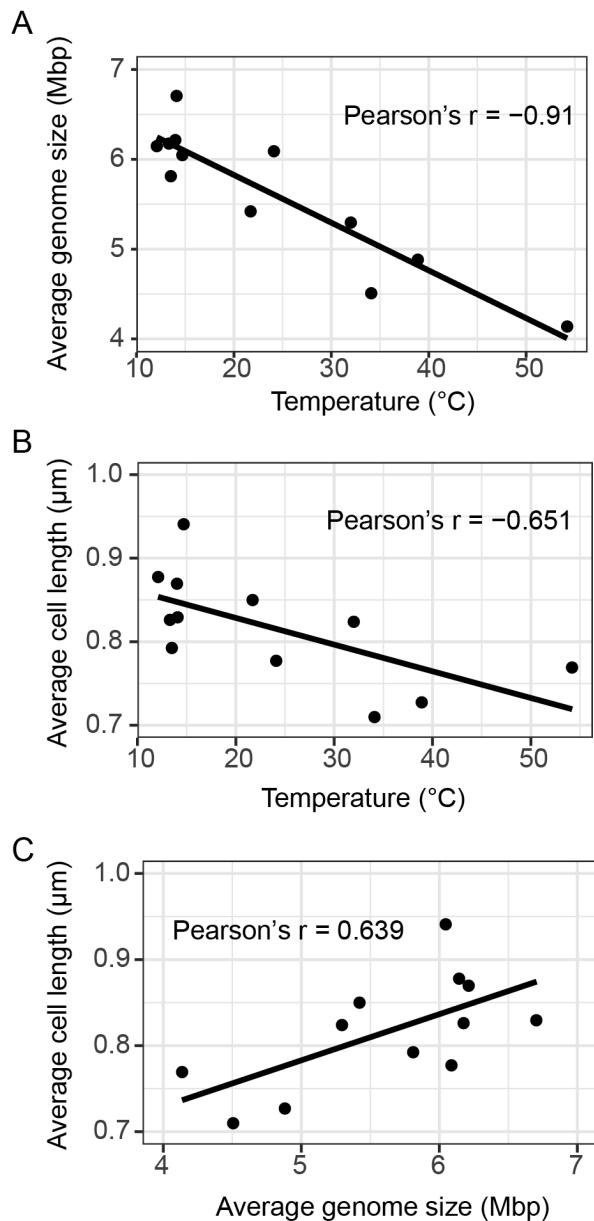

496  
497

498 Figure 2. Average genome sizes across soil metagenomes, estimated using MicrobeCensus.<sup>18</sup>  
499 Samples are ordered by average genome size and colored by sample location.

500  
501

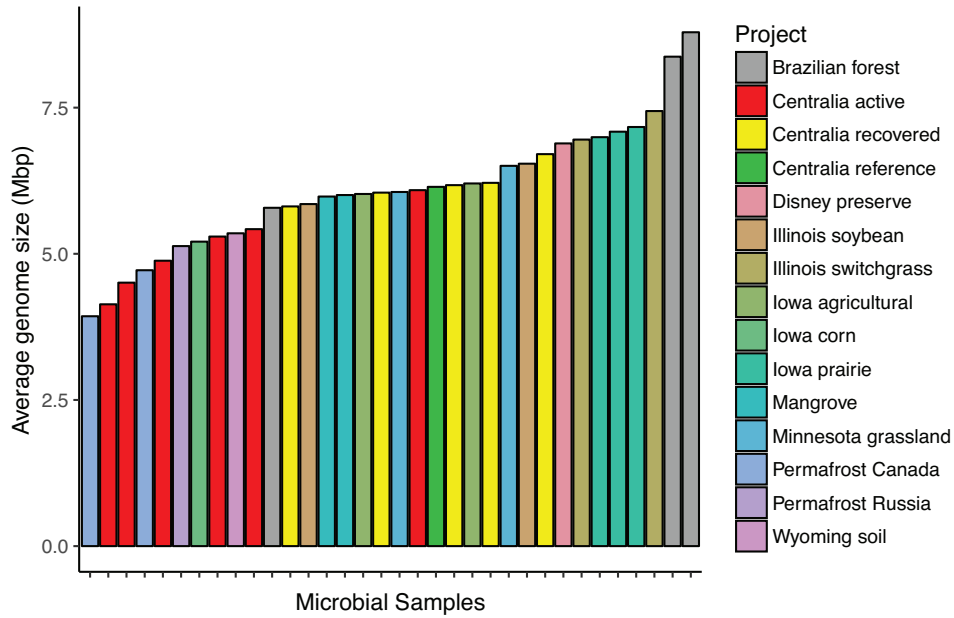

505 Figure 3. Heatmap of KEGG modules correlated with temperature (false discovery rate adjusted  
506 p-value < 0.05). Modules are centered and standardized (rows) across *Centralia* metagenomes  
507 (columns), with warm colors showing relative enrichment and cool colors showing relative  
508 depletion. Modules with significant relationships with temperature are shown. Sites are  
509 arranged by increasing temperature from left to right. (A) 27 KEGG modules were positively  
510 correlated with temperature (Pearson's R range = 0.646 - 0.933). (B) 257 KEGG modules were  
511 negatively correlated with temperature (Pearson's R range = -0.642 to -0.925). A third of the  
512 KEGG modules negatively correlated with temperature were either two-component regulatory  
513 systems (TCRS, blue dendrogram tips), antimicrobial resistance or production (ARP, gray tips),  
514 or both (black tips). Note differences in color gradient ranges across panels A and B.  
515

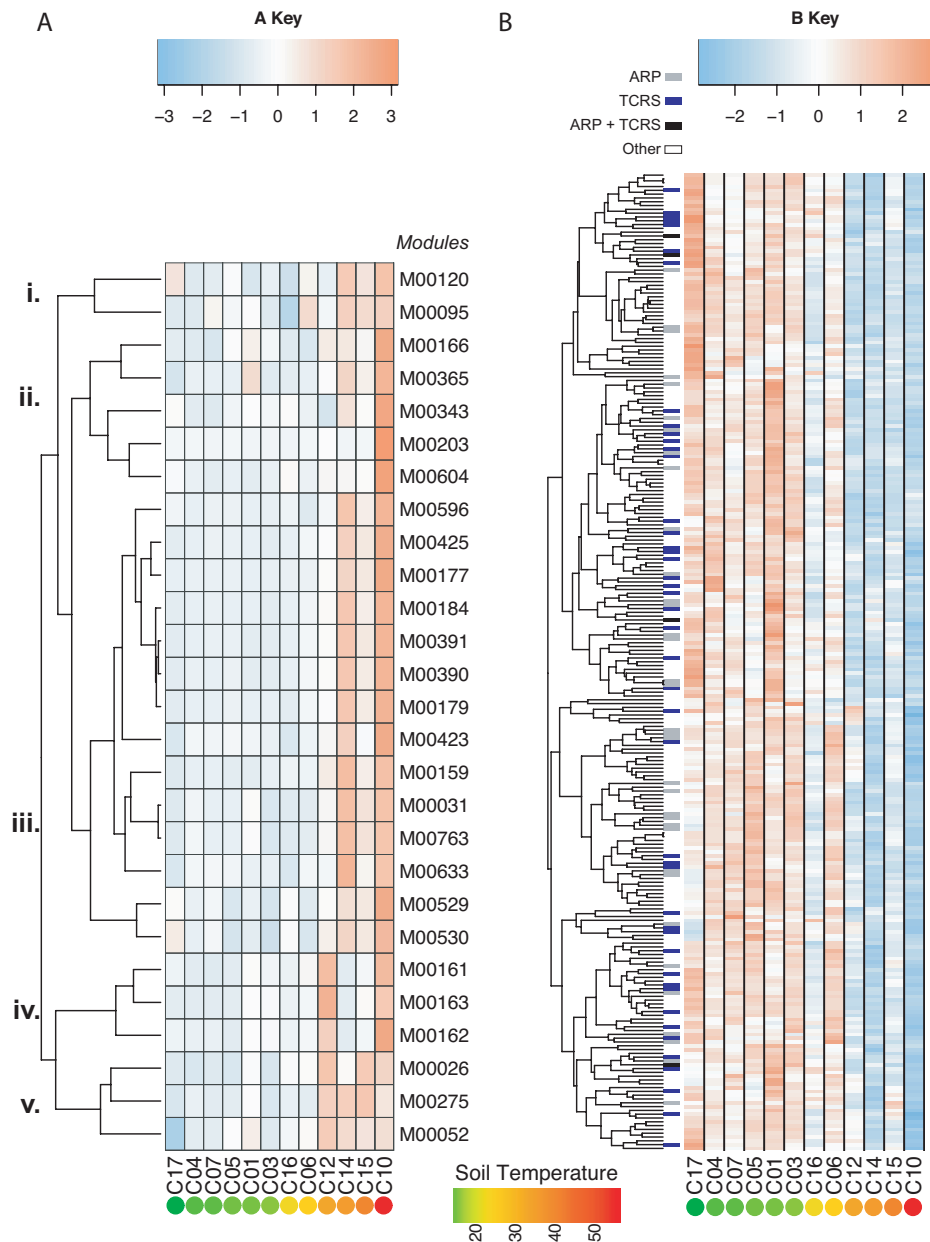

516



517 Figure 4. KEGG modules that had notable enrichments or depletions with temperature. (A) The  
518 median abundances of KEGG modules for denitrification (red), dissimilatory nitrate reduction  
519 (green) and dissimilatory sulfate reduction (blue) were all positively correlated with  
520 temperature. (B) Pearson's correlation values for all detected modules classified as antibiotic  
521 resistance and production (gray density, n = 62 detected modules) or two-component  
522 regulatory systems (blue density, n = 89 detected modules). The black vertical line  
523 distinguishes correlation values that are significant at a false discovery rate adjusted p-value <  
524 0.05 (left), and all of these had a strong and negatively relationship with temperature. In total,  
525 there were thirty-nine antimicrobial resistance and production modules and forty-nine two-  
526 component regulatory system modules that significantly decreased with temperature.  
527  
528

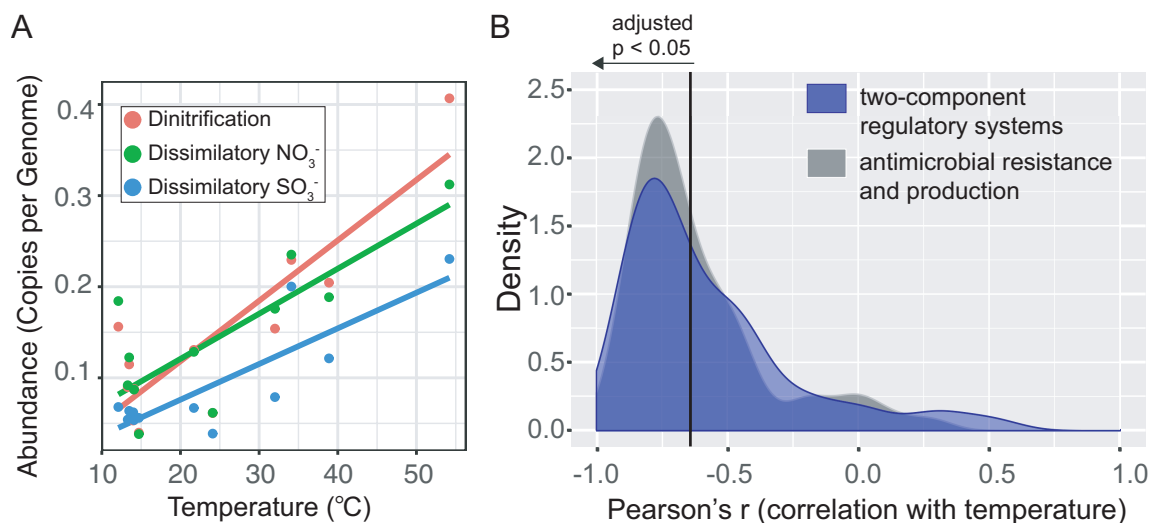

Source: https://www.biorxiv.org/content/10.1101/276584v1.full.pdf
